# Supplementary material for: Bringing computational science to the public
Source: PubMed Central journal article supplement (PMC4775721; doi:10.1186/s40064-016-1856-7), 2016-03-02
Supplement: 40064_2016_1856_MOESM1_ESM.pdf [file 40064_2016_1856_MOESM1_ESM.pdf]

Raspberry pi and bioinformatics in the Dundee science centre questionnaire

We would greatly appreciate your time to fill out the following questionnaire. Your responses to these questions are anonymous and you are free to decline to answer any question. This data will be used for evaluation of the workshop. The data may form some part of the ongoing research efforts to bring these workshops to larger audiences via scientific presentations (verbal and/or written) and future funding applications. This questionnaire is not for the Dundee science centre as a whole.

General Questions – Please colour in the circle – LIKE this ● DO NOT tick or cross like this ☒ ⊖ ☑

Have you attended the Dundee science centre or another science centre previously? Yes  No

Do you define yourself as Female, Male or Other? Female  Male  Other

If other please specify if you wish - \_\_\_\_\_

How old are you? \_\_\_\_\_

Workshop related questions

Please rank how far you agree with the following statements using the boxes provided.

Please colour in the circle – LIKE this ● DO NOT tick or cross like this ☒ ⊖ ☑

| Question                                                                                                               | Strongly agree        | Agree                 | Neutral               | Disagree              | Strongly disagree     |
|------------------------------------------------------------------------------------------------------------------------|-----------------------|-----------------------|-----------------------|-----------------------|-----------------------|
| I am interested in Science                                                                                             | <input type="radio"/> | <input type="radio"/> | <input type="radio"/> | <input type="radio"/> | <input type="radio"/> |
| Science experiments can be carried out on computers                                                                    | <input type="radio"/> | <input type="radio"/> | <input type="radio"/> | <input type="radio"/> | <input type="radio"/> |
| I use a computer more than a tablet or other hand held device                                                          | <input type="radio"/> | <input type="radio"/> | <input type="radio"/> | <input type="radio"/> | <input type="radio"/> |
| Having attended the workshop today I am less excited by science                                                        | <input type="radio"/> | <input type="radio"/> | <input type="radio"/> | <input type="radio"/> | <input type="radio"/> |
| Having attended the workshop today I think computers are useful within biology                                         | <input type="radio"/> | <input type="radio"/> | <input type="radio"/> | <input type="radio"/> | <input type="radio"/> |
| Having attended the workshop today I am more interested in programming a computer                                      | <input type="radio"/> | <input type="radio"/> | <input type="radio"/> | <input type="radio"/> | <input type="radio"/> |
| Having attended the workshop today I am likely to use a Raspberry Pi in my own time                                    | <input type="radio"/> | <input type="radio"/> | <input type="radio"/> | <input type="radio"/> | <input type="radio"/> |
| Having attended the workshop today I believe this type of workshop would be useful for students aged between 15 and 18 | <input type="radio"/> | <input type="radio"/> | <input type="radio"/> | <input type="radio"/> | <input type="radio"/> |

*Please provide your own thoughts in the boxes provided*

How easy was it to follow and understand the workshop today?

Do you have any suggestions to improve the workshop?

*Thank you*
